# Supplementary material
Source: PubMed Central journal article supplement (PMC8369994)
Supplement: JCB912405_Supplemental_Material2.pdf [file JCB912405_Supplemental_Material2.pdf]

**Supplementary Table.** Clinical characteristics of the AVM patients.

| <b>Patient</b> | <b>Age at the time of surgery</b> | <b>Sex</b> | <b>AVM location (lobe)</b> | <b>Nidus size</b> | <b>Martin-Spetzler grading</b> | <b>Bleeding</b> | <b>Seizures</b> |
|----------------|-----------------------------------|------------|----------------------------|-------------------|--------------------------------|-----------------|-----------------|
| #1             | 50                                | F          | frontal                    | 3.5 cm            | 2                              | No              | No              |
| #2             | 83                                | M          | occipital                  | 6 cm              | 4                              | Yes             | No              |
| #3             | 61                                | M          | frontal                    | 4 cm              | 4                              | No              | No              |
| #4             | 40                                | M          | parietal                   | 3.5 cm            | 3                              | Yes             | No              |
| #5             | 49                                | F          | occipital                  | 3 cm              | 3                              | Yes             | Yes             |
| #6             | 39                                | M          | temporal                   | 2.5 cm            | 2                              | Yes             | Yes             |
| #7             | 47                                | M          | cerebellar                 | 2.5 cm            | 2                              | Yes             | No              |
| #8             | 35                                | F          | temporal                   | 2.5 cm            | 2                              | Yes             | Yes             |
