# Supplementary material
Source: PubMed Central journal article supplement (PMC8369994)
Supplement: JCB912405_Supplemental_Material3.pdf [file JCB912405_Supplemental_Material3.pdf]

**Supplementary Table 2.** Clinical characteristics of control patients.

| <b>Patient</b> | <b>Age at the time of surgery</b> | <b>Sex</b> | <b>Epileptic focus location (lobe)</b> |
|----------------|-----------------------------------|------------|----------------------------------------|
| #1             | 27                                | M          | temporal                               |
| #2             | 30                                | F          | frontal                                |
| #3             | 44                                | F          | temporal                               |
| #4             | 36                                | M          | temporal                               |
| #5             | 30                                | M          | frontal                                |
